# Supplementary material for: Exome Analyses of Long QT Syndrome Reveal Candidate Pathogenic Mutations in Calmodulin-Interacting Genes
Source: PubMed Central journal article supplement (PMC4488844; doi:10.1371/journal.pone.0130329), 2015-07-01

Family D01

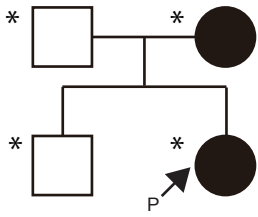

Family D02

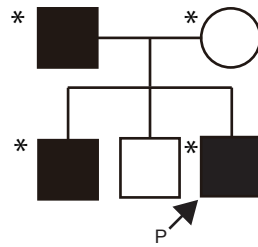

Family D03

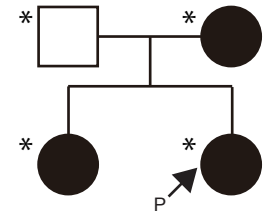

Family D04

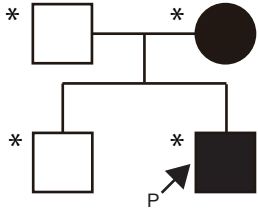

Family D05

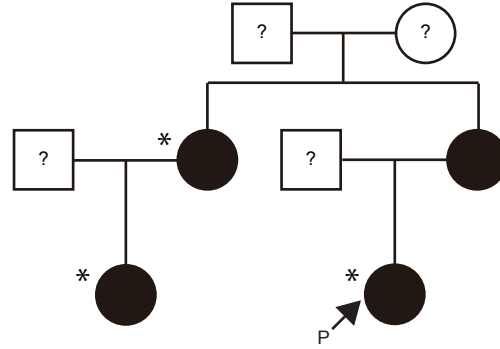

Family D06

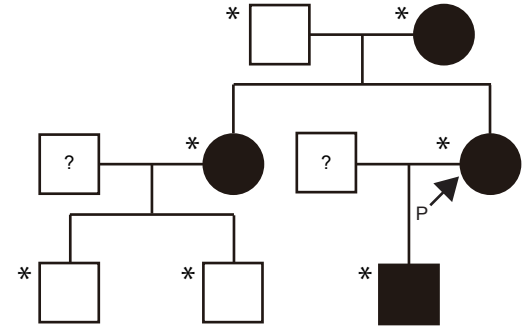

Family D07

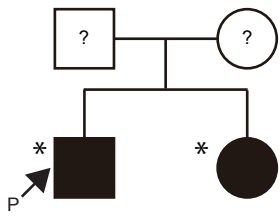

Family D08

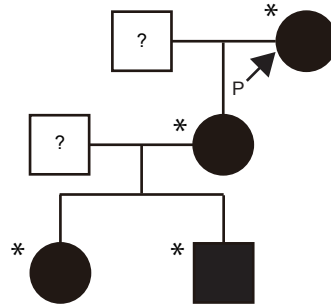

Family D09

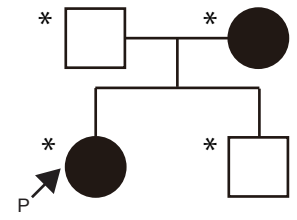

Family D10

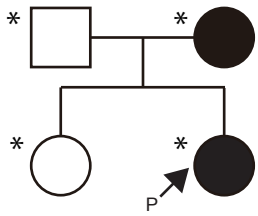

Family D11

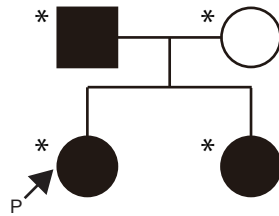

Family D12

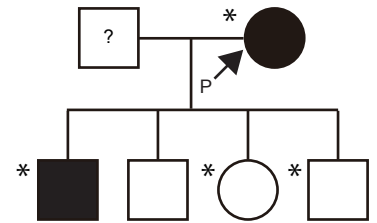

Family D13

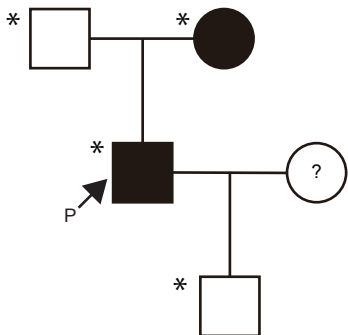

Family D14

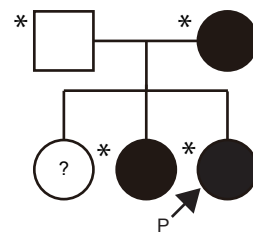

Supplement: pone.0130329.s001.pdf [file pone.0130329.s001.pdf]
