# Supplementary material for: Exome Analyses of Long QT Syndrome Reveal Candidate Pathogenic Mutations in Calmodulin-Interacting Genes
Source: PubMed Central journal article supplement (PMC4488844; doi:10.1371/journal.pone.0130329), 2015-07-01

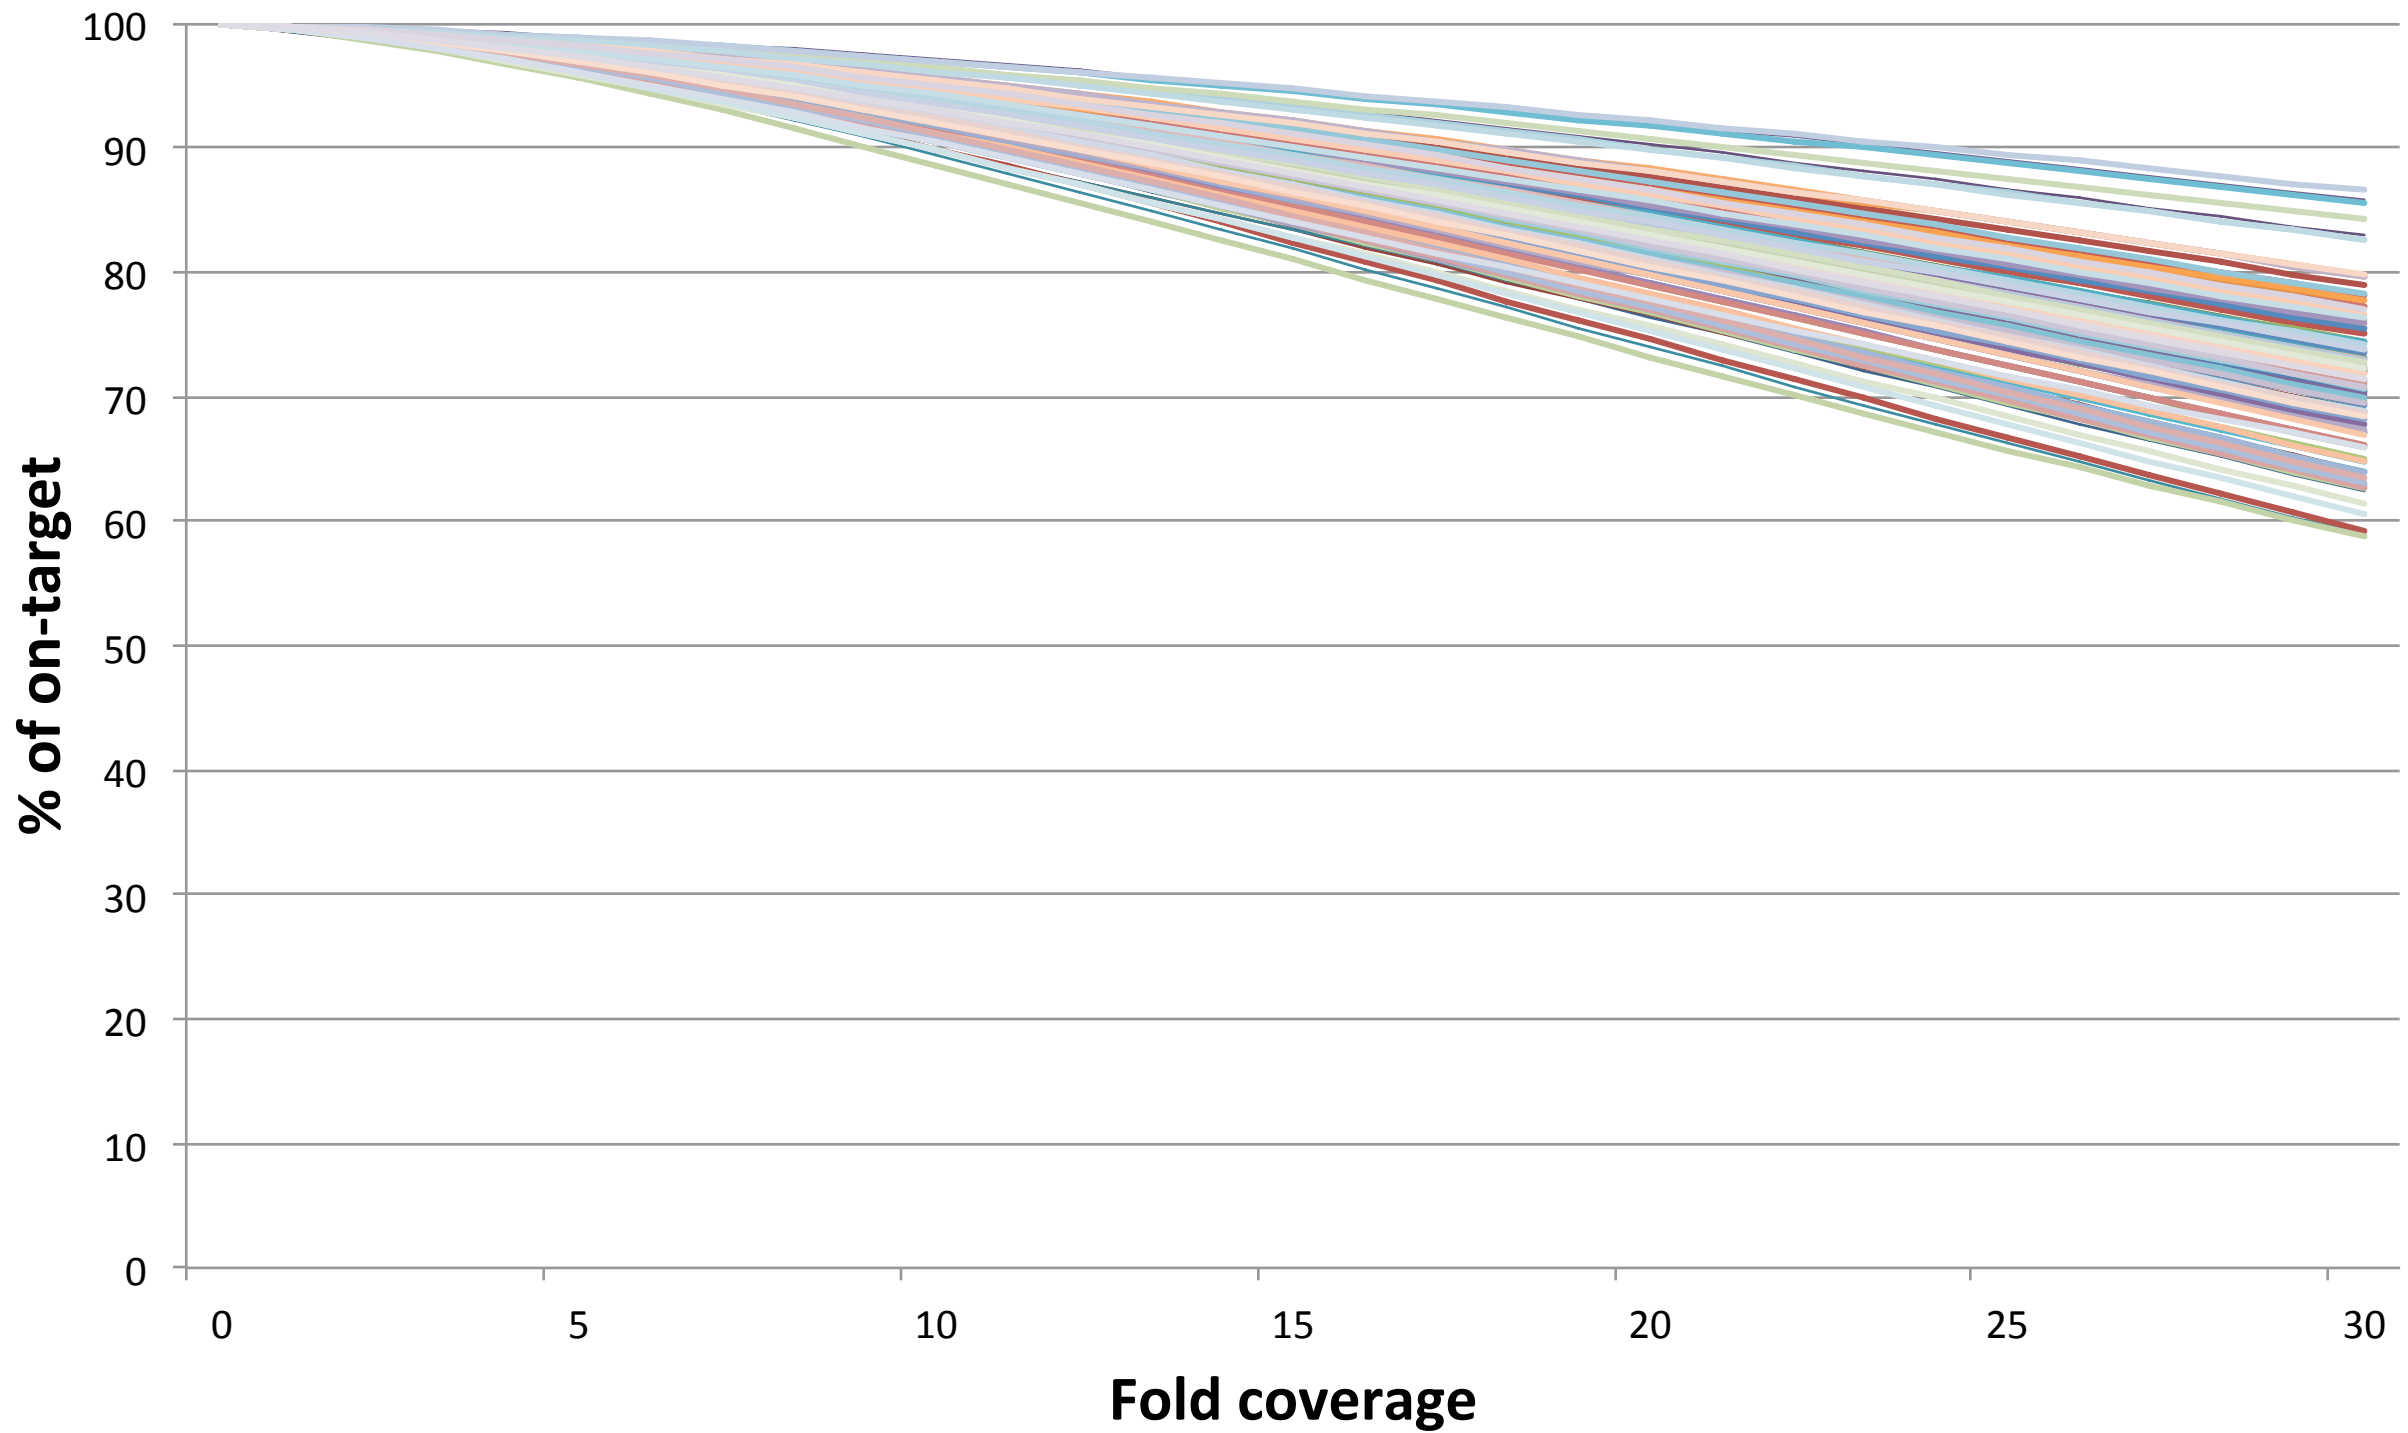

Supplement: pone.0130329.s004.pdf [file pone.0130329.s004.pdf]
