# Supplementary material for: Exome Analyses of Long QT Syndrome Reveal Candidate Pathogenic Mutations in Calmodulin-Interacting Genes
Source: PubMed Central journal article supplement (PMC4488844; doi:10.1371/journal.pone.0130329), 2015-07-01
Supplement: pone.0130329.s005.pdf [file pone.0130329.s005.pdf]

**calmodulin-interacting genes**

| Gene               | <b>RYR2 (p.A4091V)</b> | <b>UBR4 (p.A2133T)</b> | <b>UBR5 (p.H1946R, p.R1251H)</b>              | <b>PI4KA (p.D83N)</b> | <b>KIF21B (p.R1201W)</b> |
|--------------------|------------------------|------------------------|-----------------------------------------------|-----------------------|--------------------------|
| Homo sapiens       | H E P <b>A</b> K D I   | K S F <b>A</b> A T I   | S L K <b>H</b> V A Y ... K S A <b>R</b> L D L | L L S <b>D</b> V A Y  | L P T <b>R</b> G S T     |
| Macaca mulatta     | H E P <b>A</b> K D I   | K S F <b>A</b> A T I   | S L K <b>H</b> V A Y ... K S A <b>R</b> L D L | L L S <b>D</b> V A Y  | L P T <b>R</b> G S T     |
| Mus musculus       | H E P <b>A</b> K D I   | R S F <b>A</b> A T V   | S L K <b>H</b> V A Y ... K S A <b>R</b> L D L | L L S <b>D</b> V A C  | L P T <b>R</b> G S T     |
| Canis familiaris   | H E P <b>A</b> K D I   | R S F <b>A</b> A T V   | S L K <b>H</b> V A Y ... K S A <b>R</b> L D L | L L S <b>D</b> V A Y  | L P T <b>R</b> G S T     |
| Gallus gallus      | H E P <b>A</b> K D I   | K S F <b>A</b> A T I   | S L K <b>H</b> V A Y ... K S A <b>R</b> L D L | L L S <b>D</b> V A Y  | L P T <b>R</b> G S T     |
| Xenopus tropicalis | Q E P <b>A</b> K D I   | K S F <b>A</b> A T I   | S L K <b>H</b> V A Y ... K S A <b>R</b> L D L | L L S <b>D</b> V A H  | L P I <b>R</b> G N T     |
| Danio rerio        | H E P <b>A</b> K D I   | K S F <b>A</b> A T V   | S L K <b>H</b> V A Y ... K S A <b>R</b> L D L | L L S <b>D</b> V A Q  | L P I <b>R</b> G H T     |

**candidates directly interact with known LQTS genes**

| Gene               | <b>CIT (p.S1929Y)</b> | <b>RIMS1 (p.E493Q)</b> | <b>PIK3CG (p.D192N)</b> | <b>WDR26 (p.L204F)</b> | <b>SIRT6 (p.R248C)</b> | <b>SLC2A5 (p.R270W)</b> |
|--------------------|-----------------------|------------------------|-------------------------|------------------------|------------------------|-------------------------|
| Homo sapiens       | Y L A <b>S</b> S Y Q  | E K V <b>E</b> T M L   | A S R <b>D</b> P K L    | S Q T <b>L</b> L G I   | K H D <b>R</b> H A D   | S R M <b>R</b> F L K    |
| Macaca mulatta     | Y L A <b>S</b> S Y Q  | E K V <b>E</b> T M L   | A S R <b>D</b> P R L    | S Q T <b>L</b> L G I   | K H D <b>R</b> H A D   | S R M <b>R</b> F L K    |
| Mus musculus       | Y L A <b>S</b> S Y Q  | E K A <b>E</b> S M L   | A G R <b>D</b> A K L    | S Q T <b>L</b> L G I   | K H D <b>R</b> Q A D   | S Q M <b>T</b> F L K    |
| Canis familiaris   | Y L A <b>S</b> S Y Q  | E K V <b>E</b> T M L   | A G R <b>D</b> P E L    | S Q T <b>L</b> L G I   | K H D <b>R</b> H A D   | S R M <b>S</b> F L K    |
| Gallus gallus      | Y L A <b>S</b> S Y Q  | E K M <b>E</b> T M L   | A C R <b>D</b> P K L    | F Q I <b>Y</b> L - L   | - - - - -              | - - - - -               |
| Xenopus tropicalis | Y I A <b>S</b> V Y Q  | E K M <b>E</b> T M L   | S R R <b>D</b> A R L    | - - - - -              | K H - <b>K</b> H A D   | P R F <b>T</b> C L N    |
| Danio rerio        | Y L A <b>S</b> S Y Q  | Q K A <b>E</b> S M L   | S D R <b>D</b> P N L    | S - - - -              | K H A <b>R</b> G Q S   | S R F <b>T</b> F L N    |
